# Supplementary material for: Transcriptional Responses for Biosynthesis of Triterpenoids in Exogenous Inducers Treated Inonotus Hispidus Using RNA-Seq
Source: MDPI journal article supplement (doi:10.3390/molecules27238541), 2022-12-04
Supplement: s1 [file s1]

## Software List

| Tools        | Version | Description                                                                                    | Linkages                                                                                                              |
|--------------|---------|------------------------------------------------------------------------------------------------|-----------------------------------------------------------------------------------------------------------------------|
| Trinity      | v2.5.1  | A Full-length transcriptome assembly tool from RNA-Seq data without a reference genome         | <a href="https://github.com/trinityrnaseq/trinityrnaseq/wiki">https://github.com/trinityrnaseq/trinityrnaseq/wiki</a> |
| TransDecoder | v5.0.0  | An tool for identifying candidate coding regions within transcript sequences                   | <a href="http://sourceforge.net/projects/transdecoder/">http://sourceforge.net/projects/transdecoder/</a>             |
| MISA         | v1.0    | A MicroSatellite identification tool                                                           | <a href="http://pgrc.ipk-gatersleben.de/misa/misa.html">http://pgrc.ipk-gatersleben.de/misa/misa.html</a>             |
| BLAST        | v2.2.31 | Basic Local Alignment Search Tool                                                              | <a href="http://blast.ncbi.nlm.nih.gov/Blast.cgi">http://blast.ncbi.nlm.nih.gov/Blast.cgi</a>                         |
| KOBAS2.0     | v2.0    | A software to identify statistically significantly enriched pathways using hypergeometric test | <a href="http://kobas.cbi.pku.edu.cn/help.do">http://kobas.cbi.pku.edu.cn/help.do</a>                                 |
| HMMER        | v3.1b   | A tool for                                                                                     | <a href="http://hmmer.org/">http://hmmer.org/</a>                                                                     |

---

|            |             |                                                                                                                  |                                                                                           |
|------------|-------------|------------------------------------------------------------------------------------------------------------------|-------------------------------------------------------------------------------------------|
|            | 2           | searching<br>sequence<br>databases for<br>sequence<br>homologs,<br>and for<br>making<br>sequence<br>alignments   |                                                                                           |
| RSEM       | v1.2.1<br>9 | An accurate<br>tool for<br>quantifying<br>transcript<br>abundances<br>from RNA-<br>Seq data                      | <a href="http://deweylab.github.io/RSEM/">http://deweylab.github.io/RSEM/</a>             |
| TGICL      | v2.1        | A software<br>system for<br>fast<br>clustering of<br>large EST<br>datasets                                       | <a href="http://www.tigr.org/tdb/tgi/software/">http://www.tigr.org/tdb/tgi/software/</a> |
| cd-hit-est | v4.6.1      | A very widely<br>used<br>program for<br>clustering<br>and<br>comparing<br>protein or<br>nucleotide<br>sequences. | <a href="http://weizhongli-lab.org/cd-hit/">http://weizhongli-lab.org/cd-hit/</a>         |
| Blast2GO   | v2.5        | A<br>bioinformatic<br>s platform for<br>high-quality<br>protein<br>function<br>prediction<br>and                 | <a href="https://www.blast2go.com/">https://www.blast2go.com/</a>                         |

---

---

|        |         |                                                                                                                     |                                                                                                                                                   |
|--------|---------|---------------------------------------------------------------------------------------------------------------------|---------------------------------------------------------------------------------------------------------------------------------------------------|
|        |         | functional analysis of genomic datasets.                                                                            |                                                                                                                                                   |
| STAR   | v2.6.0b | An ultrafast universal RNA-seq aligner                                                                              | <a href="https://github.com/alexdobin/STAR">https://github.com/alexdobin/STAR</a>                                                                 |
| GATK   | v3.2.2  | A wide variety of tools with a primary focus on variant discovery and genotyping                                    | <a href="https://software.broadinstitute.org/gatk/">https://software.broadinstitute.org/gatk/</a>                                                 |
| DESeq2 | v1.6.3  | An R package for RNA-Seq Differential Expression Analysis based on a model using the negative binomial distribution | <a href="http://www.bioconductor.org/packages/release/bioc/html/DESeq.html">http://www.bioconductor.org/packages/release/bioc/html/DESeq.html</a> |
| edgeR  | v3.8.6  | edgeR: a Bioconductor package for differential expression analysis of digital gene expression data                  | <a href="https://www.ncbi.nlm.nih.gov/pmc/articles/PMC2796818/">https://www.ncbi.nlm.nih.gov/pmc/articles/PMC2796818/</a>                         |
| topGO  | v2.28.0 | An R package for gene ontology                                                                                      | <a href="http://www.bioconductor.org/packages/release/bioc/html/topGO.html">http://www.bioconductor.org/packages/release/bioc/html/topGO.html</a> |

---

---

|           |        |                                                    |                                                                   |
|-----------|--------|----------------------------------------------------|-------------------------------------------------------------------|
|           |        | enrichment<br>analysis                             |                                                                   |
|           |        | An open<br>source<br>software                      |                                                                   |
| Cytoscape | v3.6.1 | platform for<br>visualizing<br>complex<br>networks | <a href="http://www.cytoscape.org/">http://www.cytoscape.org/</a> |

---
